# Supplementary material for: Controlling microbial co-culture based on substrate pulsing can lead to stability through differential fitness advantages
Source: PubMed Central journal article supplement (PMC9648842; doi:10.1371/journal.pcbi.1010674), 2022-10-31
Supplement: pcbi.1010674.s004.pdf [file pcbi.1010674.s004.pdf]

# Controlling microbial co-culture populations based on substrate pulsing can lead to stability through differential fitness advantages.

J.Andres Martinez<sup>1</sup>, Matheo Delvenne<sup>1,Y</sup>, Lucas Henrion<sup>1,Y</sup>, Fabian Moreno<sup>1,Y</sup>, Samuel Telek<sup>1</sup>, Christian Dusny<sup>2</sup>, Frank Delvigne<sup>1,\*</sup>

**1** TERRA Research and Teaching Centre, Microbial Processes and Interactions (MiPI), Gembloux Agro-Bio Tech, University of Liège, Gembloux, Belgium.

**2** Microbial Single Cell Analysis, Department of Solar Materials, Helmholtz-Centre for Environmental Research- UFZ Leipzig, Permoserstr. 15 04318 Leipzig, Germany.

\* f.delvigne@uliege.be

## Supplementary File 4: Continuous and Discontinuous culture supplementary figures

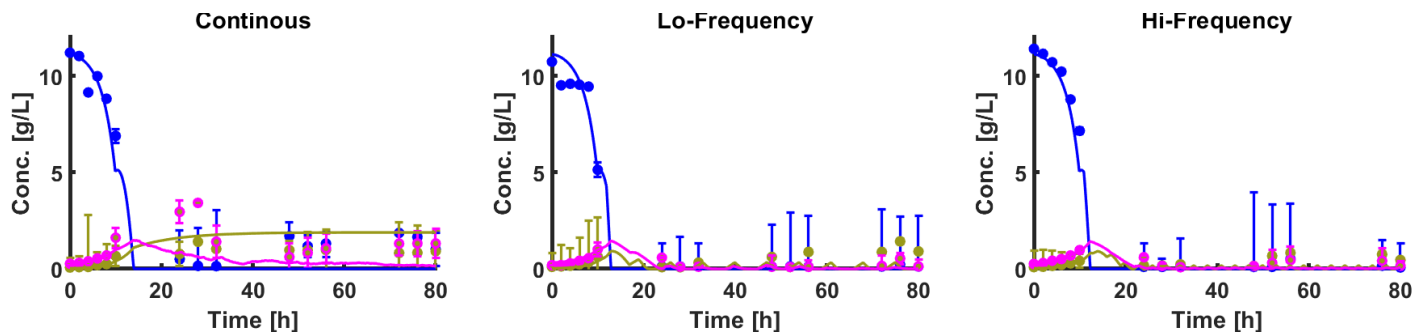

**Fig 1.** Measurement data set coverage for the Continuous, Low-frequency and High-frequency feed co-culture experiments from time 24 to 80.

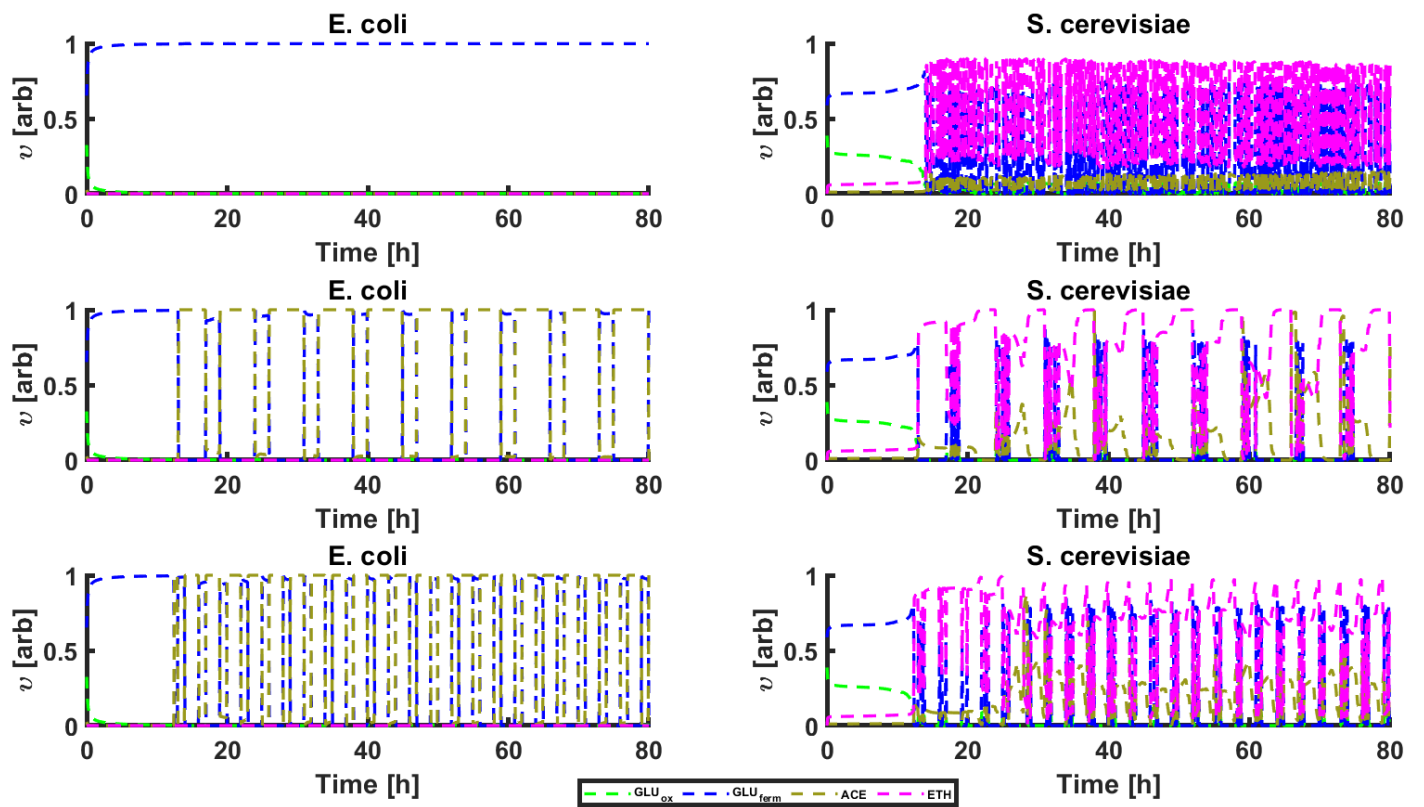

**Fig 2.** Cybernetic variable  $v$  for *E. coli* and *S. cerevisiae* during the simulations made for Continuous culture (up), low frequency (middle) and high frequency (down) pulsing experiments.

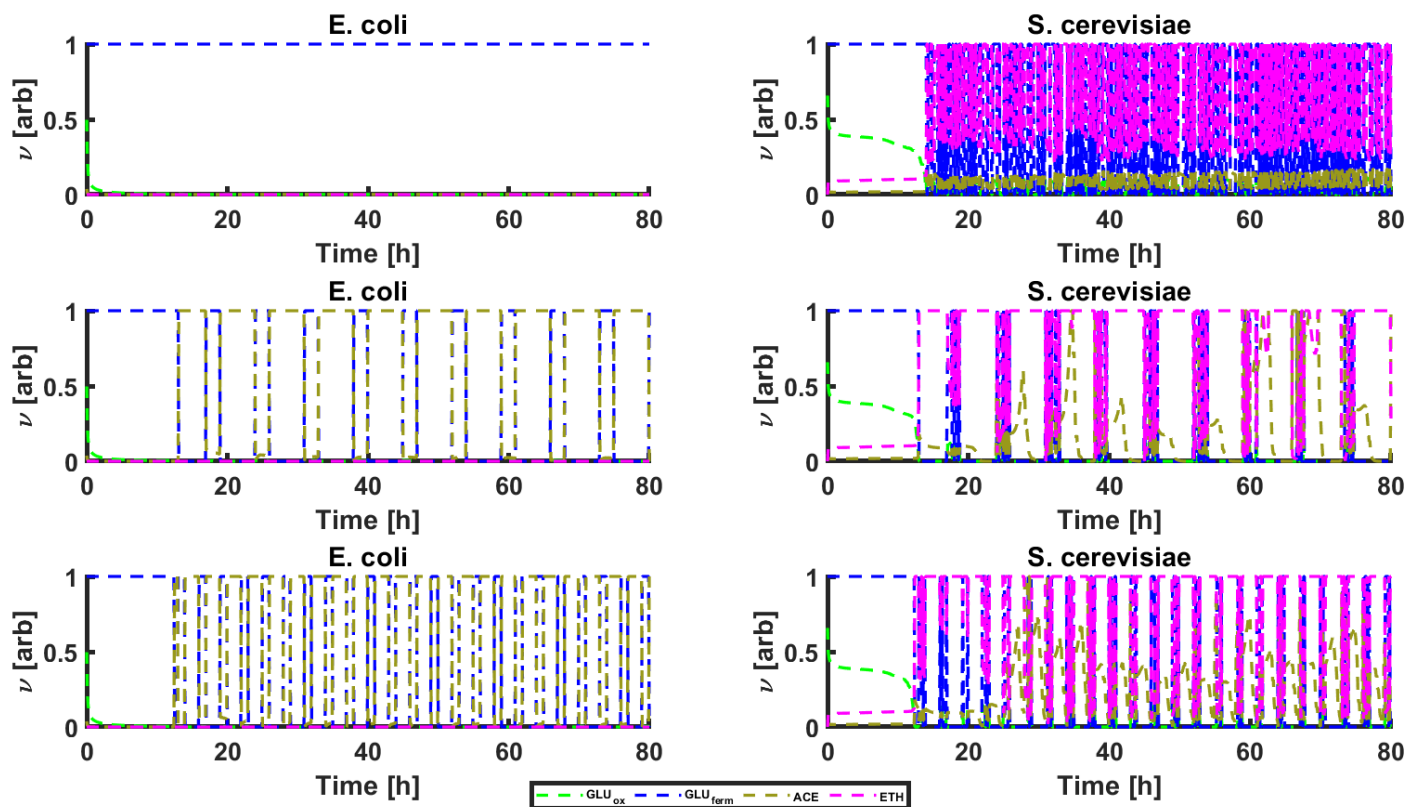

**Fig 3.** Cybernetic variable  $\nu$  for *E. coli* and *S. cerevisiae* during the simulations made for Continuous culture (up), low frequency (middle) and high frequency (down) pulsing experiments.

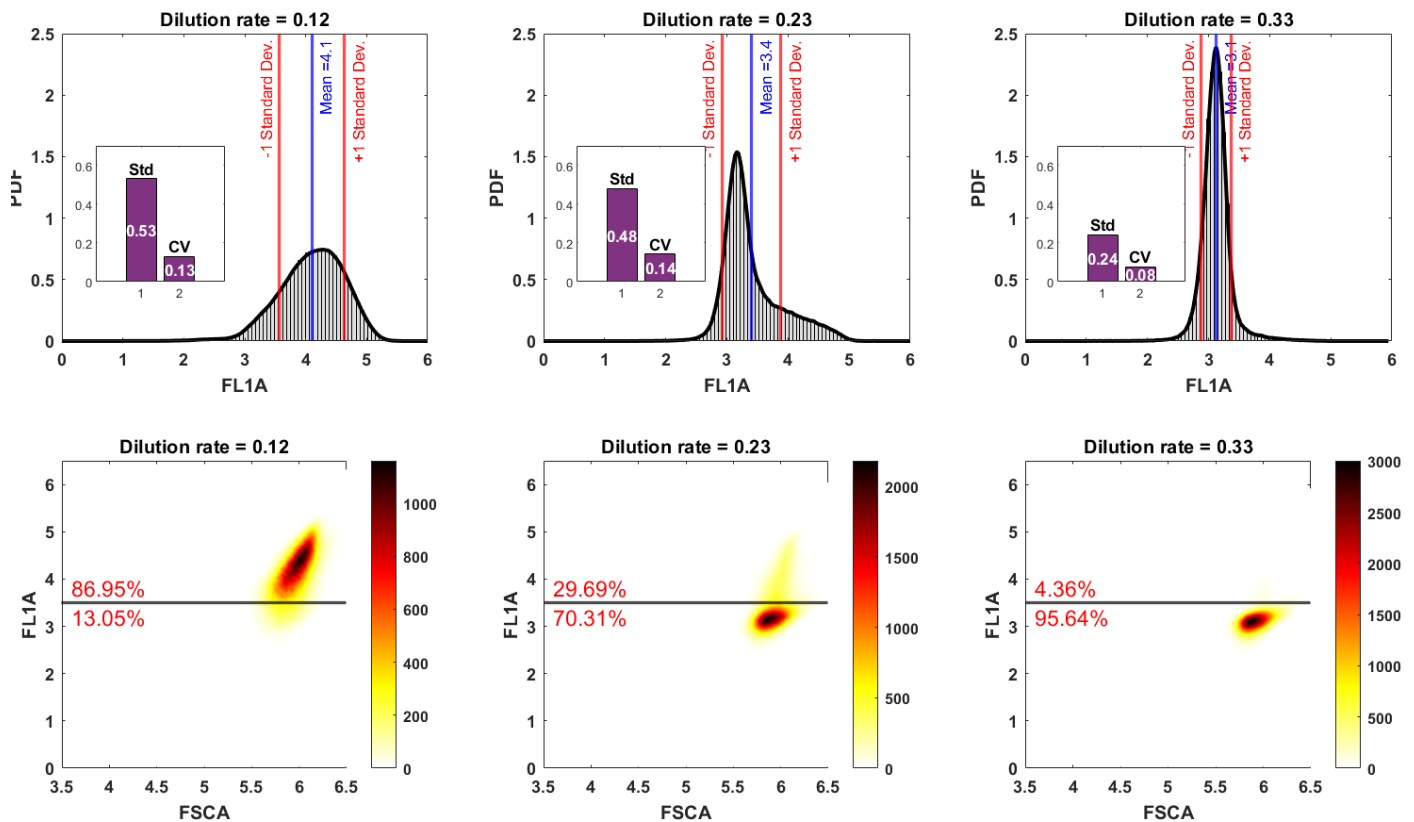

**Fig 4.** top row: FSCA Probability density function, mean, standard deviations and coefficient of variation for the axenic continuous cultures of *S. cerevisiae* at dilution rates of 0.12, 0.23 and 0.33 h<sup>-1</sup>, respectively. bottom row: Flow cytometry data for the triplicates at the different dilution rates and their GFP<sup>+</sup> and GFP<sup>-</sup> percentual calculations along the threshold at 3.5.

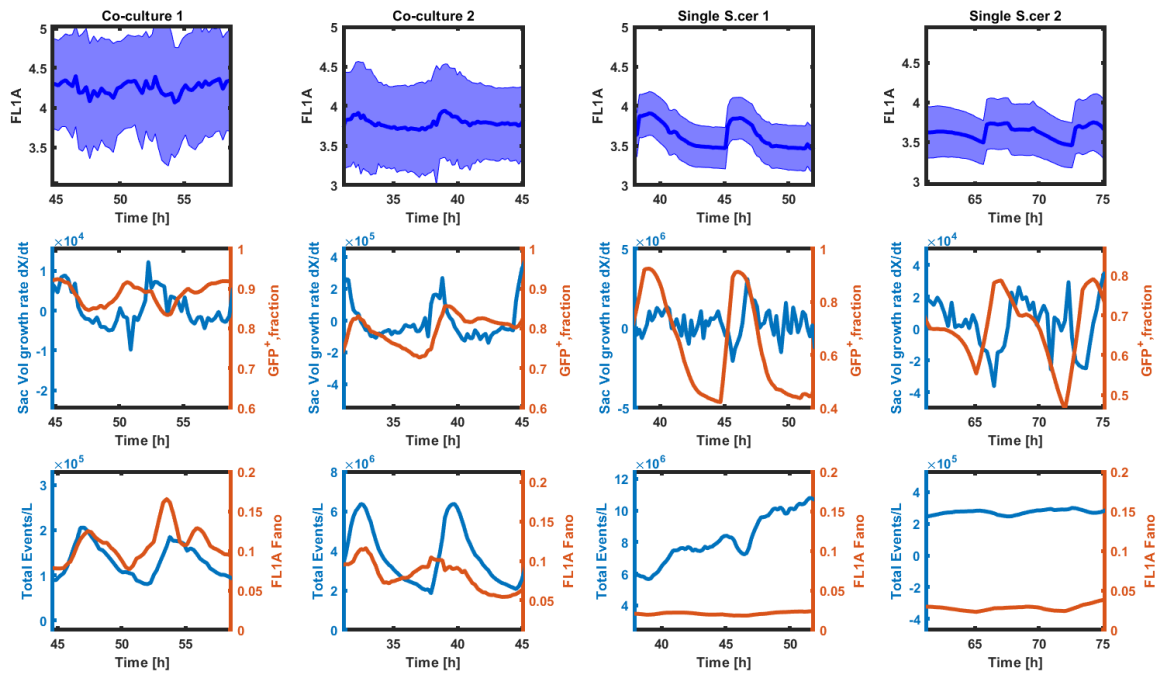

**Fig 5.** Time evolution of FL1, approximated growth rate,  $GFP^+$  fraction, total events over liter and Fano factor across example cycles for the low-frequency feed regime experiments. Plotted values correspond for *S. cerevisiae* population in coculture and in single culture (duplicates)
