# Supplementary material for: Controlling microbial co-culture based on substrate pulsing can lead to stability through differential fitness advantages
Source: PubMed Central journal article supplement (PMC9648842; doi:10.1371/journal.pcbi.1010674), 2022-10-31
Supplement: pcbi.1010674.s005.pdf [file pcbi.1010674.s005.pdf]

# Controlling microbial co-culture populations based on substrate pulsing can lead to stability through differential fitness advantages.

J.Andres Martinez<sup>1</sup>, Matheo Delvenne<sup>1,Y</sup>, Lucas Henrion<sup>1,Y</sup>, Fabian Moreno<sup>1,Y</sup>, Samuel Telek<sup>1</sup>, Christian Dusny<sup>2</sup>, Frank Delvigne<sup>1,\*</sup>

**1** TERRA Research and Teaching Centre, Microbial Processes and Interactions (MiPI), Gembloux Agro-Bio Tech, University of Liège, Gembloux, Belgium.

**2** Microbial Single Cell Analysis, Department of Solar Materials, Helmholtz-Centre for Environmental Research- UFZ Leipzig, Permoserstr. 15 04318 Leipzig, Germany.

\* f.delvigne@uliege.be

## Supplementary File 5: Nomenclature

|                       |                                                            |
|-----------------------|------------------------------------------------------------|
| $S$                   | Substrate                                                  |
| $GLU$                 | Glucose                                                    |
| $ACE$                 | Acetate                                                    |
| $ETH$                 | Ethanol                                                    |
| $\Psi$                | Virtual enzyme                                             |
| $X$                   | Biomass                                                    |
| $\Psi_{\sigma}$       | Virtual enzyme related to the S consumption                |
| $r_{\sigma}$          | Consumption rate of S                                      |
| $A$ to $N$            | Metabolites                                                |
| $a$ to $n$            | Subindex referring to the Metabolites A to N               |
| $\alpha$ to $\eta$    | Subindex referring to the Metabolites A to N as substrates |
| $M$                   | Extracellular metabolite pool                              |
| $Y$                   | Yields                                                     |
| $\varepsilon^c$       | Constitutive enzyme expression rate                        |
| $\varepsilon^i$       | Inducible enzyme expression rate                           |
| $\delta$              | Enzymatic degradation rate                                 |
| $\mu$                 | Growth rate                                                |
| $K$                   | Monod-type affinity constant                               |
| $q_{\sigma}$          | Consumption rate constant of S                             |
| $\Psi_{\sigma_{rel}}$ | Relative enzyme concentration                              |

|              |                                                       |
|--------------|-------------------------------------------------------|
| $H_{\sigma}$ | Monod-type hill function for uptake rate of S         |
| $\Phi$       | Global metabolic state                                |
| $u$          | Cybernetic variables regulating expression            |
| $v$          | Cybernetic variables regulating activity              |
| $P$          | Physiological behaviour on the cultivation conditions |
| $D$          | Dilution rate                                         |
| $w$          | Frequency of pulsing                                  |
| $s$          | Time fraction for feed pulse                          |
